# Supplementary material for: Investigating controls of shell growth features in a foundation bivalve species: seasonal trends and decadal changes in the California mussel
Source: Copernicus journal article supplement (doi:10.5194/bg-19-329-2022), 2022-01-20
Supplement: Supplementary file 1 [file bg-19-329-2022-supplement.pdf]

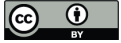

*Supplement of*

## **Investigating controls of shell growth features in a foundation bivalve species: seasonal trends and decadal changes in the California mussel**

**Veronica Padilla Vriesman et al.**

*Correspondence to:* Veronica Padilla Vriesman ([vpvriesman@ucdavis.edu](mailto:vpvriesman@ucdavis.edu))

The copyright of individual parts of the supplement might differ from the article licence.

This supplement contains eight (8) supplemental figures, one (1) supplementary text, and one (1) supplementary table.

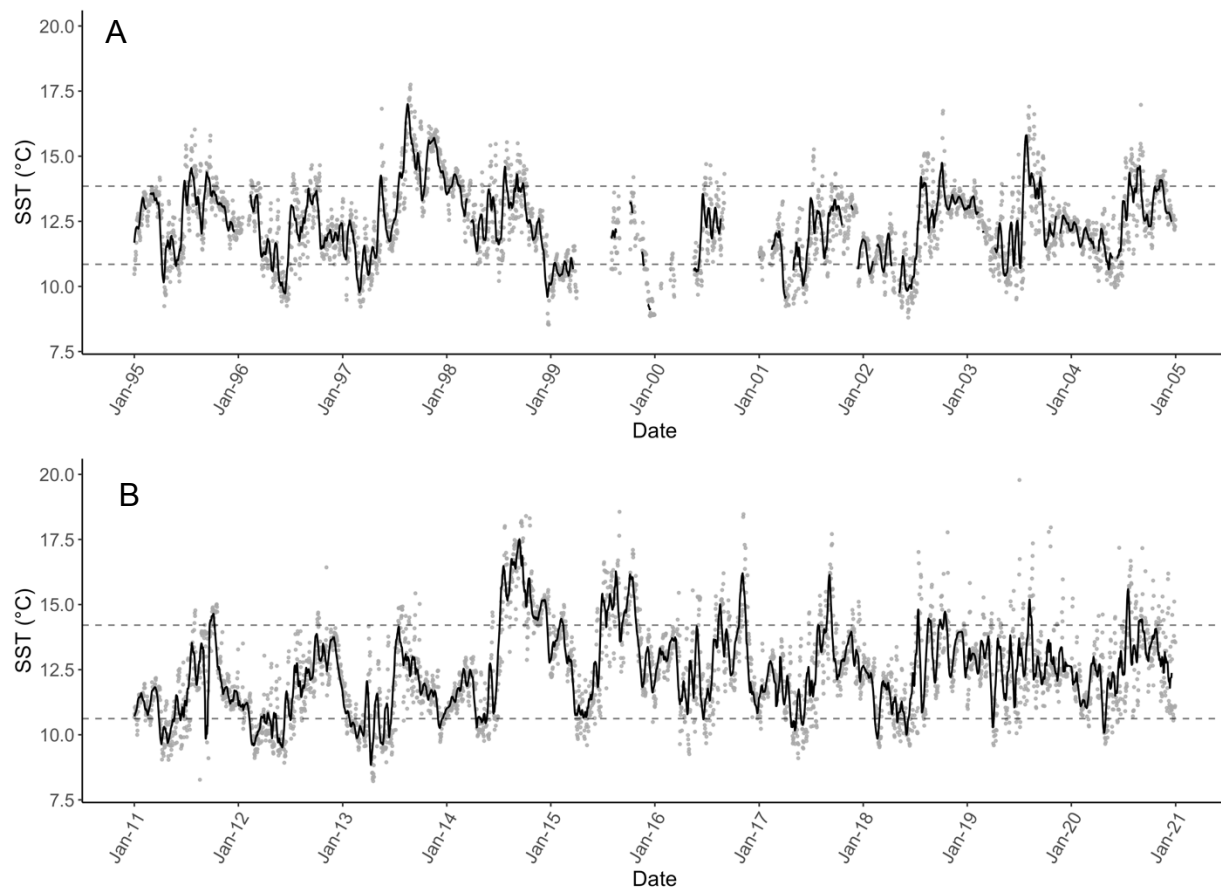

**Figure S1.** Sea surface temperature (SST) records from Bodega Ocean Observing Node (BOON) for the two study periods. Gray points represent daily SST and solid black lines represent 14-day running mean. Points within the dashed region fall within  $2\sigma$  of the average daily temperature for each 10-year-long study period. (a) SST record from January 1995 through December 2004. Missing data points in 1999-2000 were due to instrumental malfunction. (b) SST record from January 2011 through December 2020.

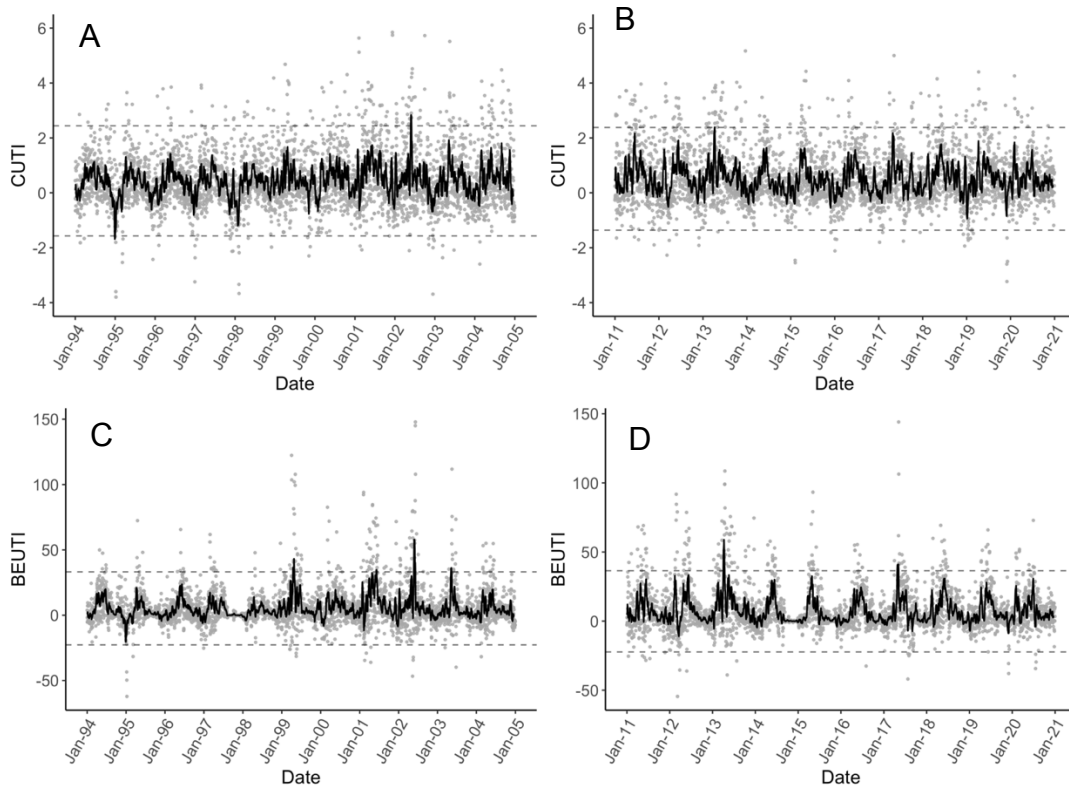

**Figure S2.** Coastal Upwelling Transport Index (CUTI) and Biologically Effective Upwelling Transport Index (BEUTI) from Jacox et al. (2018) accessible at <https://mjacox.com/upwelling-indices/>. Gray dots represent daily indices and **solid** black lines represent a 14-day running mean. Points within the dashed region fall within  $1\sigma$  of the average daily index for each upwelling index of each 10-year-long study period. (a) CUTI record from January 1994 through December 2004. (b) CUTI record from January 2011 through December 2020. (c) BEUTI record from January 1994 through December 2004. (d) BEUTI record from January 2011 through December 2020.

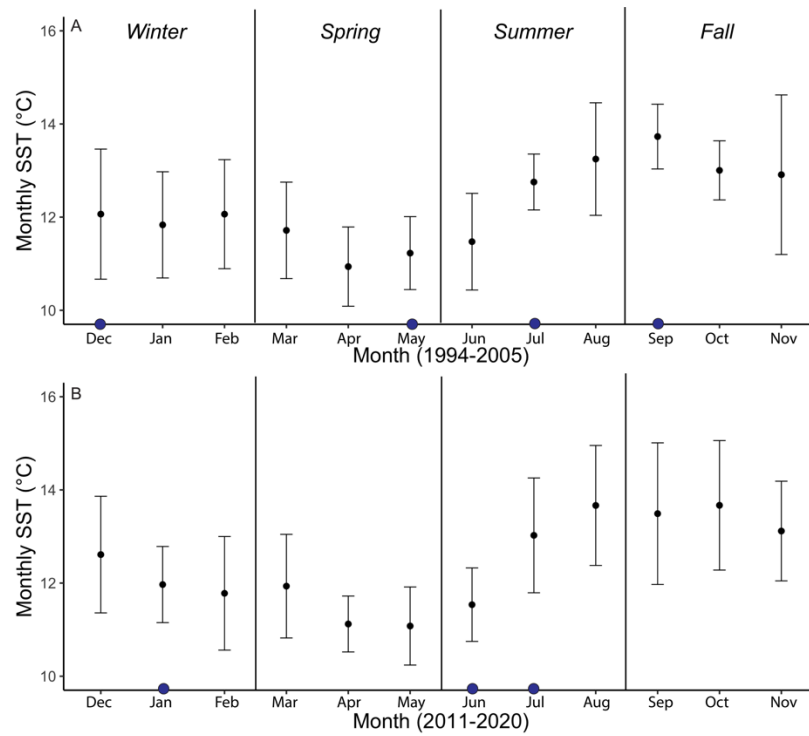

**Figure S3.** Aggregated monthly SST (°C) for both study periods to identify monthly and seasonal trends. Blue circles on x-axes represent months during which mussels were collected. (a) SST averaged for all months 1995-2004 (e.g., Jan = mean SST of all January months from 1995-2004). (b) SST averaged for all months 2011-2020 (e.g., Jan = mean SST of all January months from 2011-2020).

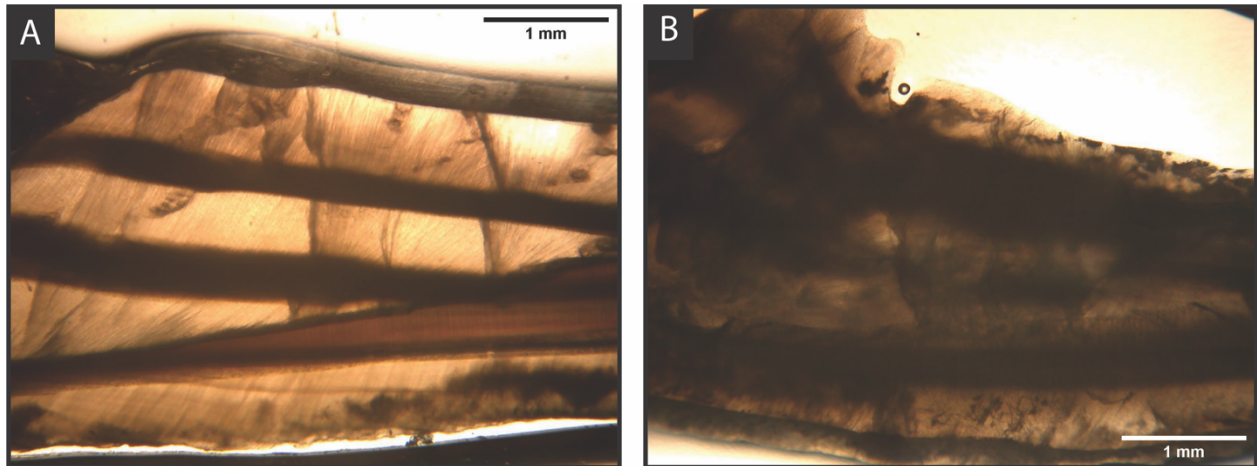

**Figure S4.** Photomicrographs taken in the region of interest for two *M. californianus* specimens polished to a uniform thickness (300  $\mu\text{m}$ ) to measure contrast between dark and light bands. (a) An example of high contrast between dark-light growth bands (standardized gray-value variance = 2.89) in the inner calcite layer. (b) An example of low contrast between dark-light growth bands in a different specimen (standardized gray-value variance = -0.78).

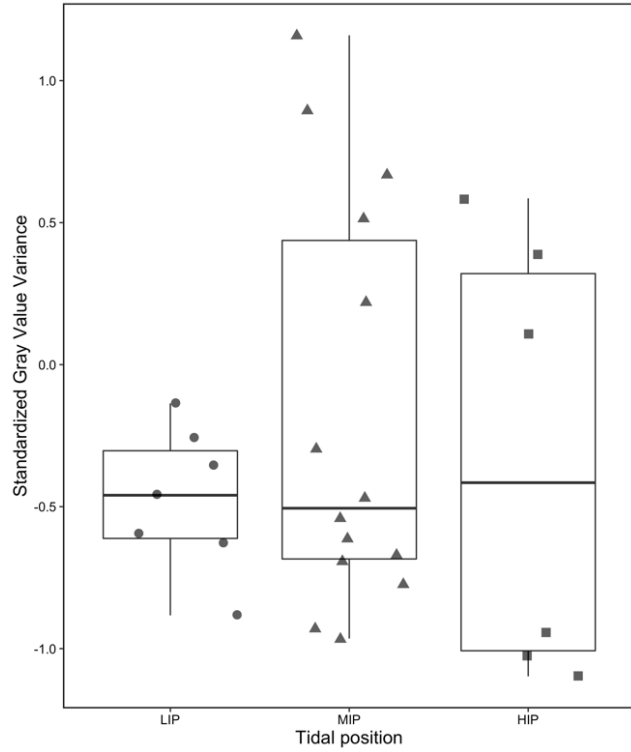

**Figure S5.** Box plot showing standardized gray value variance in modern specimens only ( $n = 27$ ). Archival specimens were excluded in this plot since all archival specimens were collected from MIP.

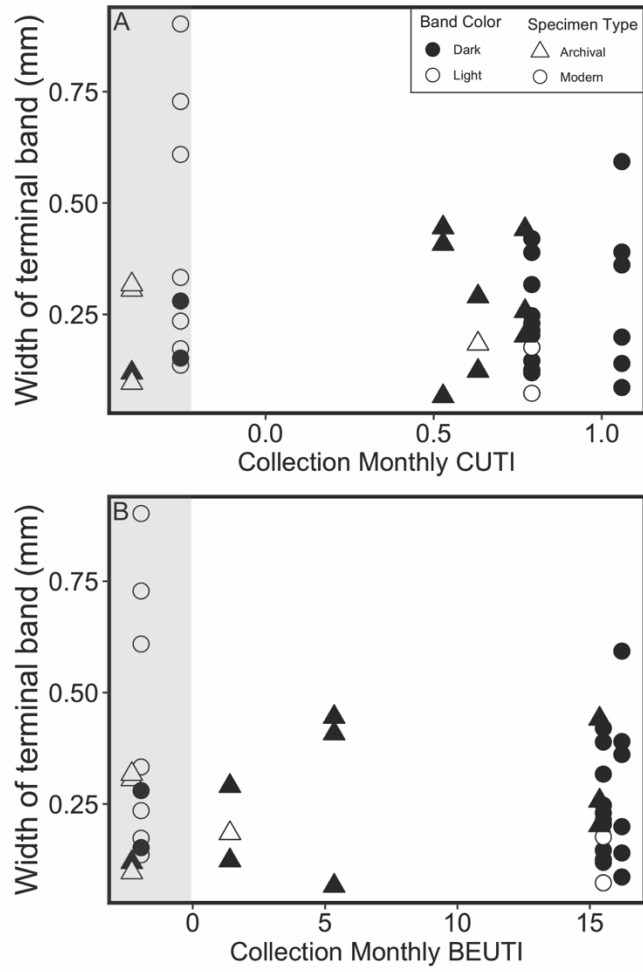

**Figure S6.** Monthly CUTI and BEUTI values for each specimen. Gray bar denotes range over which all but three specimens precipitated a light terminal band.

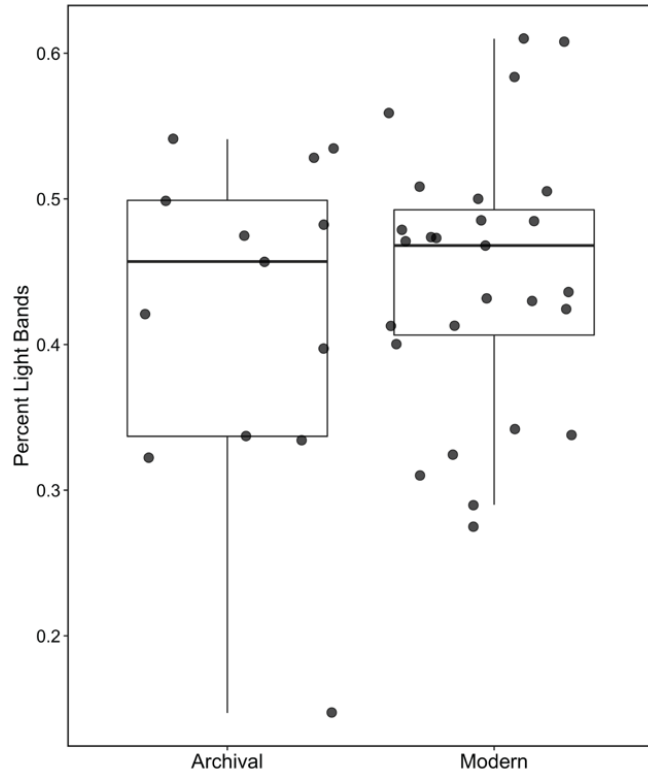

**Figure S7.** Box plot showing the percentage of light bands in archival and modern specimens. No statistically significant difference in percent of light bands between archival and modern shells.

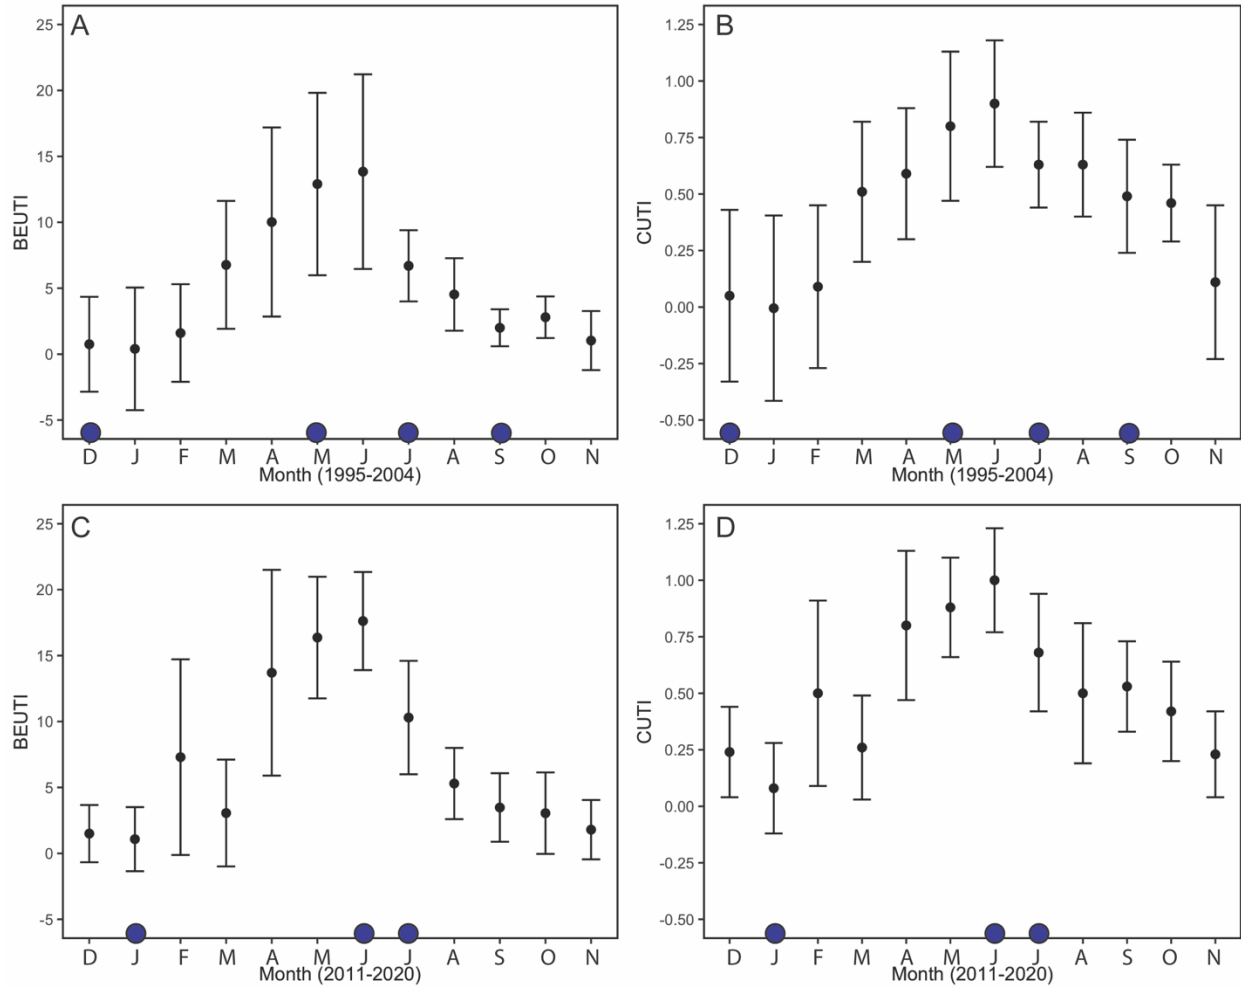

**Figure S8.** Aggregated monthly upwelling indices for both study periods to identify monthly and seasonal trends. Blue circles on x-axes represent months during which mussels were collected. (a) BEUTI averaged for all months 1995-2004 (e.g., Jan = mean BEUTI of all January months from 1994-2005). (b) CUTI averaged for all months 1995-2004 (e.g., Jan = mean CUTI of all January months from 2011-2020). (c) BEUTI averaged for all months 2011-2020 (e.g., Jan = mean BEUTI of all January months from 1994-2005). (d) CUTI averaged for all months 2011-2020 (e.g., Jan = mean CUTI of all January months from 2011-2020).

**Text S1.** The *M. californianus* individuals collected from Horseshoe Cove in June 2020 had been identified and tagged with gel nail polish in December 2019 to ensure that future collections occurred at the same micro-environment within the cove. We selected and tagged 10 shells that were > 30 mm long to minimize sample loss from dislodgement or predation of smaller juvenile shells. The eight remaining tagged individuals were collected in June 2020 with terminal shell lengths ranging from 32.3 to 41 mm (average estimated ventral margin growth rates of 6.5 mm over the course of six months, or ~ 1.1 mm per month). This supports our interpretation that an 80 mm long shell = one-year old *M. californianus* (Coe and Fox, 1942) is not applicable or reasonable for northern California mussels.

**Table S1.** Shell characteristics for all 40 specimens in the study (below).



| Specimen ID | Collection date (dd/mm/yy) | Tidal pos. | Habitat    | Shell length (mm) | Cross-sectional thickness (mm) | Inner calcite thickness (mm) | Std. gray value variance | Final growth band color |
|-------------|----------------------------|------------|------------|-------------------|--------------------------------|------------------------------|--------------------------|-------------------------|
| 51002A      | 10/05/02                   | Mid        | Open coast | 60.00             | 2.36                           | 1.81                         | -0.53                    | Dark                    |
| 51002B      | 10/05/02                   | Mid        | Open coast | 60.50             | 2.94                           | 2.37                         | 0.19                     | Dark                    |
| PB51002     | 10/05/02                   | Mid        | Open coast | 73.70             | 4.30                           | 2.63                         | -0.46                    | Dark                    |
| PB71902     | 19/07/02                   | Mid        | Open coast | 54.60             | 3.10                           | 1.25                         | -0.92                    | Dark                    |
| 71902B      | 19/07/02                   | Mid        | Open coast | 60.10             | 3.29                           | 2.02                         | -0.15                    | Dark                    |
| 71902A      | 19/07/02                   | Mid        | Open coast | 61.10             | 2.63                           | 1.66                         | 2.45                     | Dark                    |
| PB120102    | 01/12/02                   | Mid        | Open coast | 58.90             | 3.30                           | 2.27                         | 1.70                     | Dark                    |
| 12102B      | 01/12/02                   | Mid        | Open coast | 59.20             | 3.30                           | 1.96                         | 2.88                     | Light                   |
| 12102A      | 01/12/02                   | Mid        | Open coast | 60.10             | 3.09                           | 1.93                         | 0.98                     | Light                   |
| PB122302    | 23/12/02                   | Mid        | Open coast | 69.20             | 2.60                           | 1.34                         | -0.78                    | Light                   |
| 90703B      | 07/09/03                   | Mid        | Open coast | 54.70             | 2.56                           | 1.19                         | 2.17                     | Light                   |
| PB90703     | 07/09/03                   | Mid        | Open coast | 57.50             | 2.60                           | 1.77                         | -0.97                    | Dark                    |
| 90703A      | 07/09/03                   | Mid        | Open coast | 59.00             | 3.29                           | 2.70                         | 0.76                     | Dark                    |
| BBL119      | 18/01/19                   | Low        | Cove       | 32.20             | 2.00                           | 0.81                         | -0.26                    | Light                   |
| BBLX19      | 18/01/19                   | Low        | Cove       | 39.60             | 2.30                           | 0.90                         | -0.35                    | Light                   |
| BBLY19      | 18/01/19                   | Low        | Cove       | 41.00             | 2.00                           | 1.26                         | -0.88                    | Light                   |
| BBMX19      | 18/01/19                   | Mid        | Cove       | 46.30             | 3.70                           | 3.02                         | 1.16                     | Light                   |
| BBH119      | 18/01/19                   | High       | Cove       | 49.50             | 2.40                           | 1.07                         | -1.03                    | Light                   |
| BBH219      | 18/01/19                   | High       | Cove       | 54.20             | 3.40                           | 2.05                         | 0.59                     | Light                   |
| BBMY19      | 18/01/19                   | Mid        | Cove       | 56.50             | 3.70                           | 2.13                         | 0.51                     | Light                   |
| BBM319      | 18/01/19                   | Mid        | Cove       | 68.90             | 3.60                           | 2.37                         | 0.67                     | Dark                    |
| BBH319      | 18/01/19                   | High       | Cove       | 70.10             | 3.60                           | 1.50                         | -0.94                    | Dark                    |
| BB7114      | 11/07/19                   | Mid        | Cove       | 72.10             | 2.51                           | 1.92                         | -0.67                    | Dark                    |
| BB7116      | 11/07/19                   | Mid        | Cove       | 73.10             | 2.85                           | 2.15                         | -0.61                    | Dark                    |
| BB7113      | 11/07/19                   | Mid        | Cove       | 76.60             | 3.20                           | 3.59                         | 0.22                     | Dark                    |
| BB7111      | 11/07/19                   | Mid        | Cove       | 78.60             | 2.55                           | 1.38                         | -0.54                    | Dark                    |
| BB7112      | 11/07/19                   | Mid        | Cove       | 83.50             | 3.10                           | 2.77                         | -0.47                    | Dark                    |
| BB7115      | 11/07/19                   | Mid        | Cove       | 93.80             | 4.00                           | 3.46                         | 0.90                     | Dark                    |
| OCM220      | 06/06/20                   | Mid        | Open coast | 31.60             | 1.00                           | 0.36                         | -0.69                    | Dark                    |
| OCM320      | 06/06/20                   | Mid        | Open coast | 32.10             | 1.30                           | 0.44                         | -0.78                    | Dark                    |
| BBMB20      | 06/06/20                   | Mid        | Cove       | 32.30             | 1.30                           | 0.66                         | -0.29                    | Light                   |
| BBLB20      | 06/06/20                   | Low        | Cove       | 33.50             | 1.00                           | 0.38                         | -0.63                    | Dark                    |
| BBMA20      | 06/06/20                   | Mid        | Cove       | 35.30             | 1.80                           | 1.61                         | -0.93                    | Dark                    |
| BBMC20      | 06/06/20                   | Mid        | Cove       | 35.50             | 1.80                           | 0.80                         | -0.96                    | Light                   |
| BBHC20      | 06/06/20                   | High       | Cove       | 36.20             | 1.80                           | 0.63                         | -1.10                    | Dark                    |
| BBHA20      | 06/06/20                   | High       | Cove       | 38.80             | 1.90                           | 0.31                         | 0.11                     | Dark                    |
| BBLA20      | 06/06/20                   | Low        | Cove       | 38.90             | 1.50                           | 0.90                         | -0.14                    | Dark                    |

|        |          |      |            |       |      |      |       |      |
|--------|----------|------|------------|-------|------|------|-------|------|
| BBLC20 | 06/06/20 | Low  | Cove       | 41.00 | 1.20 | 0.66 | -0.60 | Dark |
| OCMM20 | 06/06/20 | High | Open coast | 71.60 | 2.70 | 1.88 | 0.39  | Dark |
| OCLL20 | 06/06/20 | Low  | Open coast | 73.70 | 3.50 | 2.42 | 0.00  | Dark |
